# Supplementary material for: Insular Celtic population structure and genomic footprints of migration
Source: PLOS journal article supplement (doi:10.1371/journal.pgen.1007152), 2018-01-25

British component

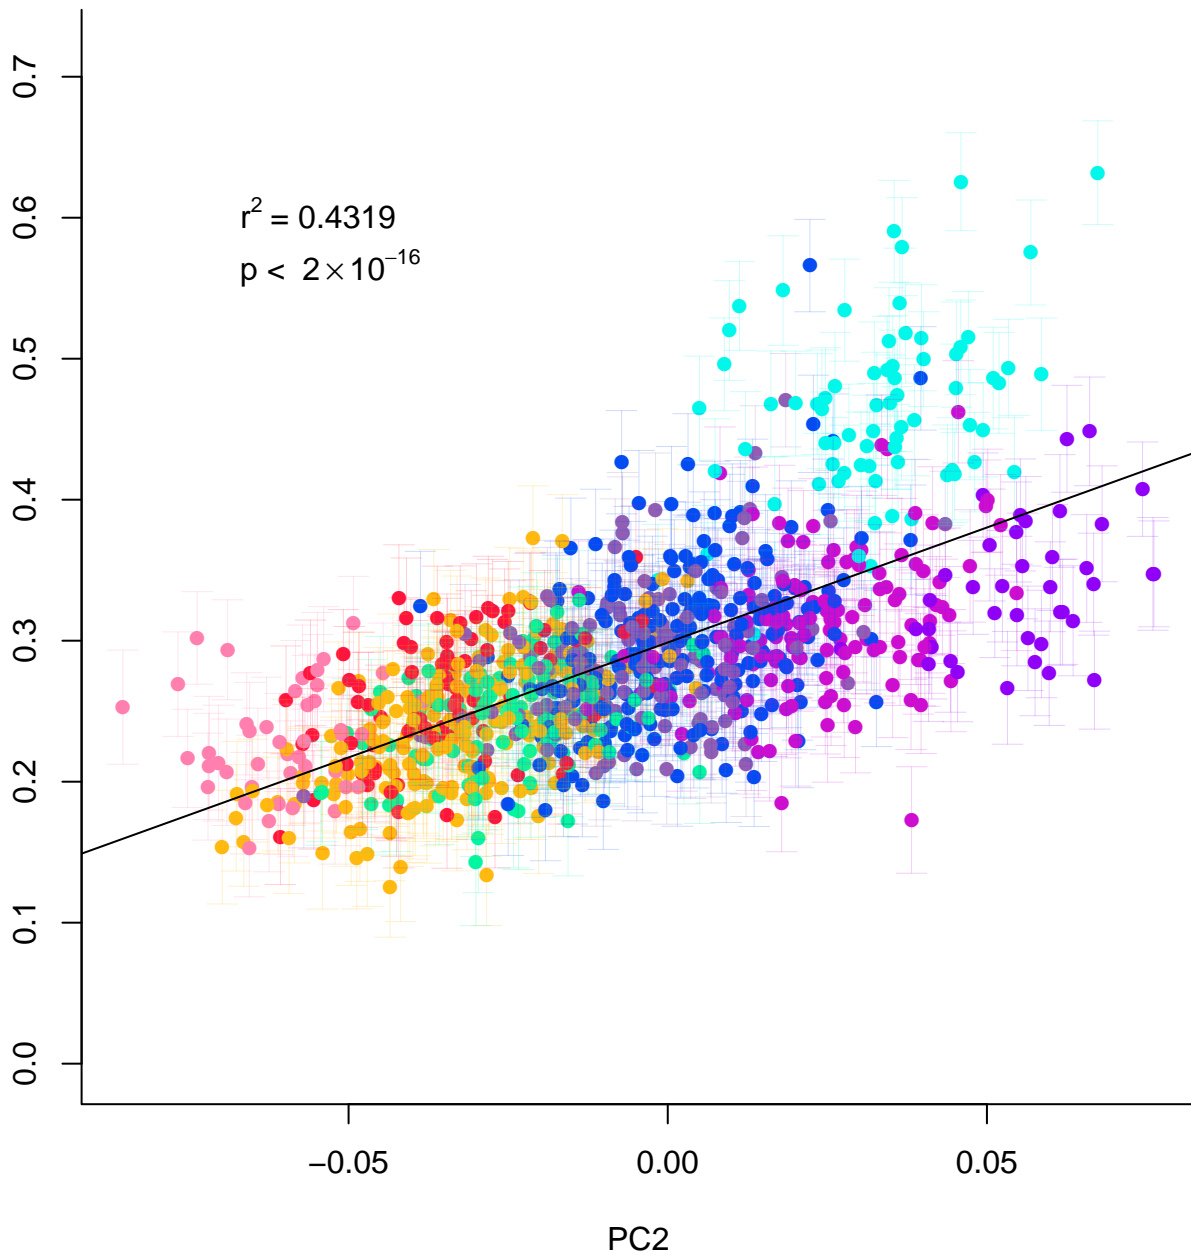

Supplement: S11 (10.1371/journal.pgen.1007152.s011) [file journal.pgen.1007152.s011]
